# Supplementary material for: Maximizing the number of Rh 0 –Rh + sites through metal dispersion control for the synthesis of higher alcohols from syngas
Source: Royal Society of Chemistry journal article supplement (doi:10.1039/d4ta04890c), 2024-01-01
Supplement: d4ta04890c1.pdf [file d4ta04890c1.pdf]

Supplementary Information for

**Maximizing the number of Rh<sup>0</sup>-Rh<sup>+</sup> sites through metal dispersion  
control for the synthesis of higher alcohols from syngas**

Ruyang Wang<sup>1</sup>, Heng Cao<sup>1</sup>, Peiyu Ma<sup>1</sup>, Jun Bao<sup>1,\*</sup>

<sup>1</sup>National Synchrotron Radiation Laboratory, Key Laboratory of Precision and Intelligent Chemistry,  
*i*ChEM (Collaborative Innovation Center of Chemistry for Energy Materials), University of Science  
and Technology of China, Hefei, Anhui 230026, China.

**Corresponding authors:**

\*baoj@ustc.edu.cn. (J.B.)

## Methods

### Sample preparation

Synthesis of Ceria support: 1.39 g of  $\text{Ce}(\text{NO}_3)_3 \cdot 6\text{H}_2\text{O}$  and 15.4 g of NaOH were dissolved in 8 and 56 mL of deionized water, respectively. The two solutions were mixed and stirred continually for 30 min. The mixed solution was then transferred into a Teflon-lined stainless-steel autoclave and hydrothermally treated at 100 °C for 24 h. The formed precipitation was centrifuged and rinsed with deionized water until the pH of the rinse water was about 7, and then rinsed three times with pure ethanol. The resulting sample was dried at 80 °C for 8 h and calcined in air at 400 °C for 4 h to obtain fresh  $\text{CeO}_2$  support.<sup>1,2</sup>

Synthesis of Rh/ $\text{CeO}_2$  Catalysts: Rh/ $\text{CeO}_2$  was prepared by incipient wetness impregnation method. Typically, the desired amount of  $\text{RhCl}_3$  aqueous solution was added dropwise to  $\text{CeO}_2$  powder, and the resulting slurry was stirred continually for 10 min. The obtained sample was dried at 60 °C for 8 h and then calcined in air at 450 °C for 4 h to obtain fresh Rh/ $\text{CeO}_2$  catalysts. The Rh loading (1-8 wt. %) was adjusted by varying the concentration of  $\text{RhCl}_3$  solution. The Rh/ $\text{CeO}_2$  catalysts with different Rh loading are named xRh/ $\text{CeO}_2$ , where x represents the Rh loading. Prior to the reaction, the catalysts were reduced in a flow of  $\text{H}_2$  (20 mL  $\text{min}^{-1}$ ) at 400 °C for 4 h to obtain the reduced Rh/ $\text{CeO}_2$  catalysts.

### Characterizations

Brunauer-Emmett-Teller (BET) surface areas were tested on a Micromeritics Tristar II 3020 surface area and porosity analyzer. Raman spectra were performed on a LabRAM HR Evolution Raman spectrometer. Transmission Electron Microscopy (TEM) images were taken on a Hitachi H-7650 transmission electron microscope operating at an acceleration voltage of 100 kV. X-ray diffraction (XRD) patterns were recorded on a Philips X'Pert Pro Super diffractometer with Cu-K $\alpha$  radiation ( $\lambda = 1.54178 \text{ \AA}$ ). XPS measurements were performed on a Thermo ESCALAB 250Xi X-ray photoelectron spectrometer with Al K $\alpha$  ( $h\nu = 1486.6 \text{ eV}$ ) as the exciting source. The high-angle annular dark-field scanning transmission electron microscope

(AC-HAADF-STEM) images were performed on a Themis Z spherical aberration corrected transmission electron microscope. The actual Rh loading in the catalyst was calculated based on the results of inductively coupled plasma atomic emission spectroscopy (ICP-AES) test. ICP-AES were performed on a Thermo Fisher iCAP 7400. The catalysts before calcination were dissolved in aqua regia for 12 hours, and the solution was diluted and filtered for ICP-AES test.

For the calculation of the total length of Rh-CeO<sub>2</sub> interface perimeter, it is assumed that the Rh particles in the catalysts are approximately hemispherical in shape. For a Rh crystal with a face centered cubic (FCC) structure, the atomic radius of the Rh atom is

$$r_{Rh} = \frac{\sqrt{2} \times 3 \times d_{111}}{4 \times \sqrt{3}} = 0.135 \text{ nm}$$

where  $d_{111}$  is the interplanar spacing of the (111) crystal planes of Rh particles shown in the HAADF-STEM images. The total volume of 1 g of Rh crystal

$$V_{Rh} = \frac{N_A}{103} \times \frac{4}{3} \times \pi \times r_{Rh}^3 \times \frac{1}{74.05 \%}$$

where  $N_A$  is Avogadro constant, 74.05 % is the space utilization rate of FCC densest stacking. The volume of individual Rh particle in the catalysts is

$$v_{Rh} = \frac{1}{2} \times \frac{4}{3} \pi R^3$$

where  $R$  is the radius of Rh particles shown in the HAADF-STEM images. In the catalyst containing 1 g of Rh, the total length of the Rh-CeO<sub>2</sub> interface perimeter is

$$L_{Rh-CeO_2} = \frac{V_{Rh}}{v_{Rh}} \times 2\pi R$$

After simplification, the total length of the Rh-CeO<sub>2</sub> interface perimeter in Rh/CeO<sub>2</sub> catalysts is

$$L_{Rh-CeO_2} = \frac{2.4 \times 10^{11}}{R^2} = \frac{9.6 \times 10^{11}}{D^2} \text{ (m/g}_{Rh}\text{)}$$

where  $D$  is the diameter of Rh particles shown in the HAADF-STEM images, and the unit of  $D$  is nanometer.

X-ray absorption fine structure (XAFS) spectra, including X-ray absorption near-edge structure (XANES) and extended X-ray absorption fine structure (EXAFS)

was performed at the BL11B beamline of Shanghai Synchrotron Radiation Facility (SSRF, Shanghai). A Si (311) monochromator was used for energy selection. The storage ring was operated at 3.5 GeV with an injection current of 200 mA. Rh foil was used as a reference sample and all X-ray absorption spectra were obtained in transmission mode. The raw XAFS data were processed using the Athena of the Demeter software package, and the fitting of EAXFS were implemented using the Artemis.

To characterize the reduced samples, the fresh Rh/CeO<sub>2</sub> catalysts were first loaded into a quartz tube and reduced in a tube furnace according to the reduction conditions. After the reduction is complete, both ends of the quartz tube were sealed and transferred to a glove box filled with high purity nitrogen. The sample was placed in a sealable sample holder specifically designed for the XPS testing to ensure that the sample were protected from air exposure during the test. For XAFS testing, the reduced samples were sealed in the glove box with special tape to avoid exposure to the atmosphere during testing.

Metal dispersion experiment, H<sub>2</sub> temperature-programmed reduction (H<sub>2</sub>-TPR) and CO temperature-programmed desorption (CO-TPD) experiments were conducted on an automatic chemisorption equipment (Micromeritics, Model AutoChem II 2920). In the metal dispersion experiment, CO was used as the adsorbed molecule, and the ratio of Rh atoms to adsorbed CO molecules was assumed to be 1:1. After reduction, the catalyst was subjected to CO pulsing experiments, and the dispersion of Rh was calculated by calculating the number of Rh atoms exposed on the surface based on the consumption of CO. For H<sub>2</sub>-TPR, the catalysts were first treated in a stream of He at 150 °C for 60 min. After cooling to room temperature in He, the gas flow was switched to H<sub>2</sub>/Ar and purged continuously until the baseline was stabilized. The temperature was raised to 800 °C at a heating rate of 10 °C/min, and the hydrogen consumption was monitored by a thermal conductivity detector (TCD). Before entering the TCD, the off-gas passed through a cold trap to remove the contained water. For CO-TPD, the reduced catalyst samples were first treated in a stream of He at 150 °C for 60 min, cooled to room temperature in He, then switched to CO/Ar and

held for 30 min. Subsequently, it was switched to He, and purged continuously until the baseline was stabilized. The temperature was then increased to 800 °C at a heating rate of 10 °C/min, and desorbed CO was monitored by a thermal conductivity detection (TCD) system.

H-D exchange experiment was carried out on a homemade micro-reactor, and a time-of-flight mass spectrometry was used to detect reactants and products in the exhaust gas. After the catalyst was loaded into the reactor, it was first heated up to 400 °C in 10% H<sub>2</sub>/Ar and kept for 15 min to eliminate the slight oxidation caused by brief exposure of the samples to air. After the temperature of the reactor was cooled to 30 °C, 10% H<sub>2</sub>/Ar (30 ml/min) and 10% D<sub>2</sub>/Ar (30 ml/min) were introduced into the reactor simultaneously, and intensity changes of H<sub>2</sub> (m/e = 2), D<sub>2</sub> (m/e = 4), and HD (m/e = 3) were recorded.

*In situ* diffuse reflectance infrared Fourier transform spectrum (DRIFTS) was collected on a Fourier transform infrared spectrometer (Thermo Fisher Nicolet iS50) equipped with a Harrick Praying Mantis DRIFT cell. Before testing, the samples were first reduced in a tube furnace according to the reduction conditions. The reduced samples were loaded into the DRIFT cell and then reduced in 10% H<sub>2</sub>/Ar (20 ml/min) at 400 °C for 15 min to eliminate the slight oxidation caused by brief exposure of the samples to air, and then the experiment was performed. The DRIFTS were collected by accumulating 64 scans at a resolution of 8 cm<sup>-1</sup> in Kubelka-Munk units. A series of *in situ* DRIFTS experiments were performed:

*In situ* CO DRIFTS at 25 °C: For the CO adsorption DRIFTS experiment at 25 °C, the sample was first pretreated in the infrared cell in Ar (30 ml/min) at 400 °C for 4 h, and then cooled to 25 °C to collect the background spectra. The feed gas was switched to 10% CO/Ar (15 ml/min) and the infrared spectra were collected until the CO adsorption reached saturation. Subsequently, the infrared cell was continuously purged by Ar to remove gaseous CO and unstable adsorbed CO, and the infrared spectra of chemisorbed CO species on the catalyst surface were obtained.

*In situ* CO-CO+H<sub>2</sub> DRIFTS at 320 °C: The samples were pretreated under the same conditions and then cooled to 320 °C in Ar (30 ml/min) to collect background spectra.

Then, 10% CO/Ar (15 ml/min) was passed into the infrared cell, and the spectra were collected until the CO adsorption reached saturation. Subsequently, 10% H<sub>2</sub>/Ar (30 ml/min) was introduced while maintaining a continuous flow of 10% CO/Ar (15 ml/min) to ensure that the ratio of H<sub>2</sub>/CO is 2.0 in the gas stream. The infrared spectra was collected until the spectra stabilized.

*In situ* CO-H<sub>2</sub>-D<sub>2</sub> DRIFTS at 125 °C: The samples were pretreated under the same conditions and then cooled to 320 °C in Ar (30 ml/min) to collect background spectra. Then, 10% CO/Ar (15 ml/min) was passed into the infrared cell. After the CO adsorption was saturated, the feed gas was switched to 10% H<sub>2</sub>/Ar (30 ml/min) and the infrared spectra were collected until the spectra stabilized. Subsequently, the feed gas was then switched to 10% D<sub>2</sub>/Ar (30 ml/min) and the infrared spectra were collected. The total amount of Rh species contained in the catalysts with different loading filled into the reactor was equal to ensure comparability.

### **Computational Details**

All the calculations were performed in the framework of the density functional theory with the B3LYP method. The 6-311g (d, p) basis set was used for C, O and H atoms and LANL2DZ basis set was used for Rh atom. The long-range van der Waals interaction was described by the DFT-D<sub>3</sub> approach. Rh<sub>4</sub> cluster was used to simulate the Rh nanoparticles. To account for the effect of CeO<sub>2</sub> on attracting electrons from Rh nanoparticles, we apply a one-unit positive charge to the Rh<sub>4</sub> cluster.

### **Catalyst Tests**

The catalyst performance for HAS were evaluated in a stainless steel fixed-bed reactor equipped with a 9 mm inner diameter quartz-lined tube. Typically, a certain amount of catalyst was diluted with quartz sand and loaded into a quartz-lined tube. For catalysts with different Rh loading, the amount of catalyst and quartz sand were adjusted to ensure that the mass of Rh in the catalyst and the height of the catalyst bed were the same for each experiment. For example, 800 mg of catalyst and 1.2 g of

quartz sand were used for 1Rh/CeO<sub>2</sub>; 100 mg of catalyst and 1.8 g of quartz sand were used for 8Rh/CeO<sub>2</sub>.

Before the reaction, the catalyst was reduced in the reactor at 400 °C for 4 h with a H<sub>2</sub> flow rate of 20 mL min<sup>-1</sup>, and then cooled to room temperature. Subsequently, the reactant gas mixture of 60% H<sub>2</sub>/30% CO/10% N<sub>2</sub> was introduced into the reactor and then the reaction pressure and temperature were raised to set values. The standard reaction conditions are 320 °C, 3.0 MPa, and a gas-hourly space velocity (GHSV) of 0.3 L mg<sub>Rh</sub><sup>-1</sup> h<sup>-1</sup>.

The off-gas was cooled in an ice-water bath to separate gas and liquid phases under reaction pressure. Two on-line gas chromatographs (Agilent GC-8860) were used to analyze the reaction products. One chromatograph equipped with a TCD was used to analyze H<sub>2</sub>, N<sub>2</sub>, CO, CH<sub>4</sub>, and CO<sub>2</sub>; another chromatograph was equipped with two FID detectors, one of which was used to analyze the gaseous hydrocarbon products such as CH<sub>4</sub>, C<sub>2</sub>H<sub>6</sub>, etc., and the other was used to analyze the liquid oxygenated compounds. In calculating catalytic performance, CO conversion is defined as:

$$X_{CO} = 1 - \frac{A_{out}(CO)/A_{out}(N_2)}{A_{in}(CO)/A_{in}(N_2)}$$

where  $A_{in}(CO)$  and  $A_{in}(N_2)$  refer to the chromatographic peak area of CO and N<sub>2</sub> in the feed gas, and  $A_{out}(CO)$  and  $A_{out}(N_2)$  refer to the chromatographic peak area of CO and N<sub>2</sub> in the off-gas. Product selectivity is defined as:

$$Sel_{C_i} = \frac{N_{C_i} \times i}{\sum N_{C_i} \times i}$$

where  $N_{C_i}$  is the number of moles generated per hour of  $C_i$  product containing  $i$  carbon atoms. The ratio of non-dissociated and dissociated adsorbed CO is defined as:

$$\frac{\sum N_{C_i} \times i_n}{\sum N_{C_i} \times i_d}$$

where  $i_n$  is the number of carbon atoms in the  $C_i$  product that are attached to oxygen atoms, and  $i_d$  is the number of carbon atoms in the  $C_i$  product that are not attached to oxygen atoms.

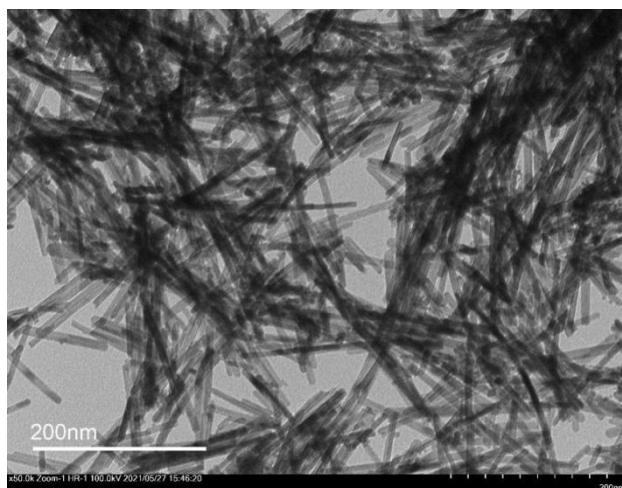

**Fig. S1.** TEM images of fresh CeO<sub>2</sub> support.



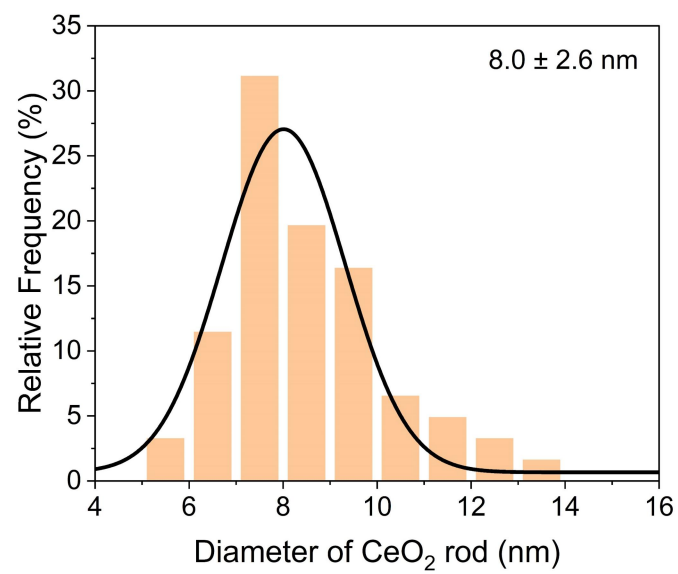

**Fig. S2.** Diameter distribution histograms of CeO<sub>2</sub> support.

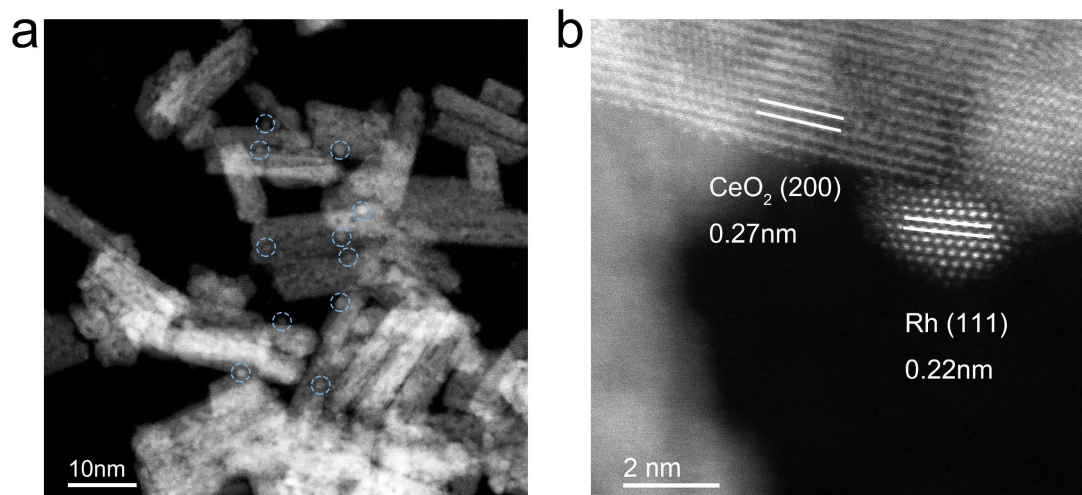

**Fig. S3. a-b,** HAADF-STEM images of reduced 8Rh/CeO<sub>2</sub> catalyst.

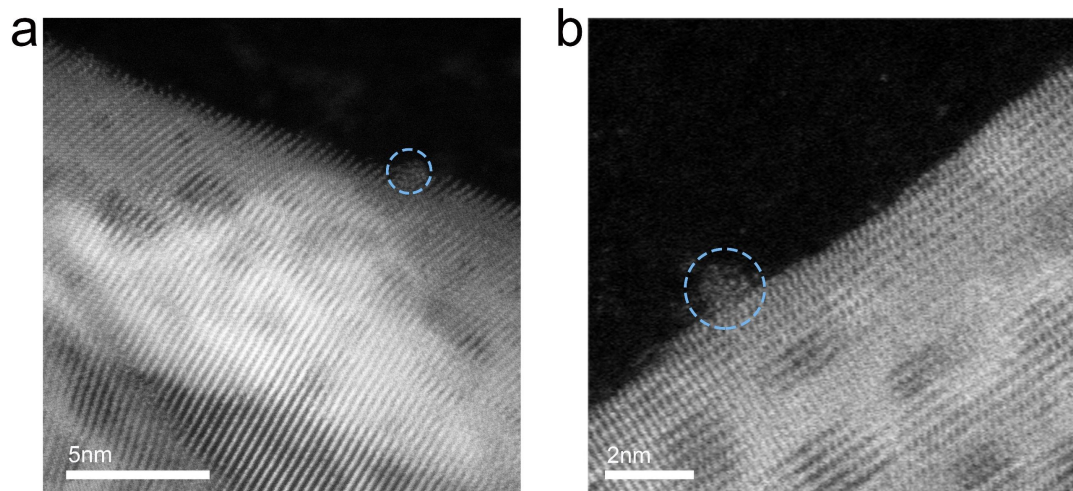

**Fig. S4. a-b,** HAADF-STEM images of reduced 1Rh/CeO<sub>2</sub> catalyst.

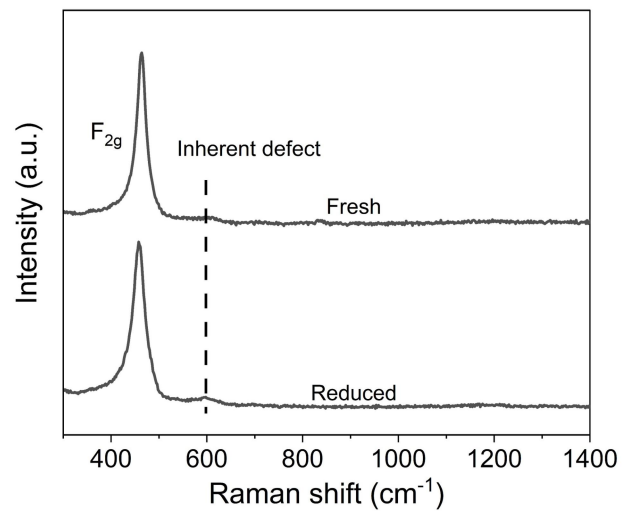

**Fig. S5.** Raman spectra of fresh and reduced CeO<sub>2</sub> support.

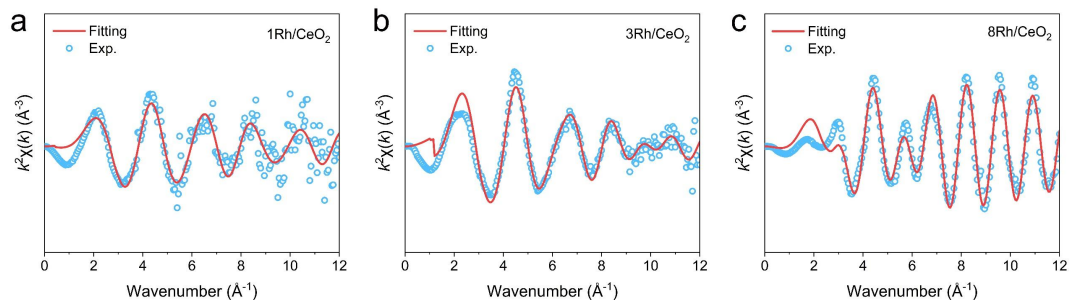

**Fig. S6. a-c,** Experimental and fitting EXAFS results in  $k$ -space of 1Rh/CeO<sub>2</sub> (a), 3Rh/CeO<sub>2</sub> (b), and 8Rh/CeO<sub>2</sub> (c).

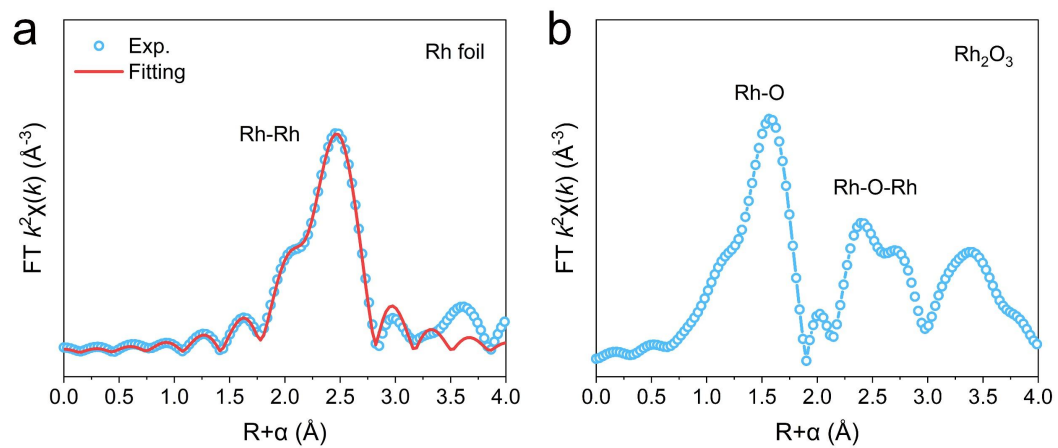

**Fig. S7.** (a) Experimental and fitting EXAFS results of Rh foil. (b) Experimental EXAFS results of  $\text{Rh}_2\text{O}_3$ .

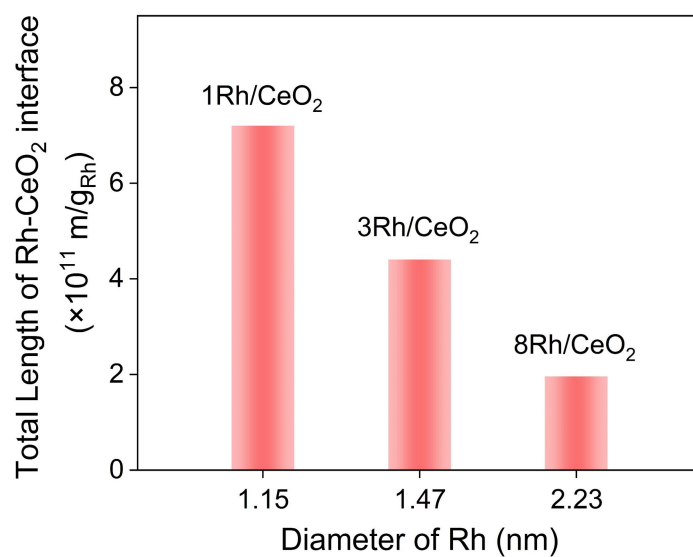

**Fig. S8.** The total length of Rh-CeO<sub>2</sub> interface perimeter in reduced Rh/CeO<sub>2</sub> catalysts with different size of Rh nanoparticles, calculated by assuming hemi sphericity of the Rh nanoparticles.

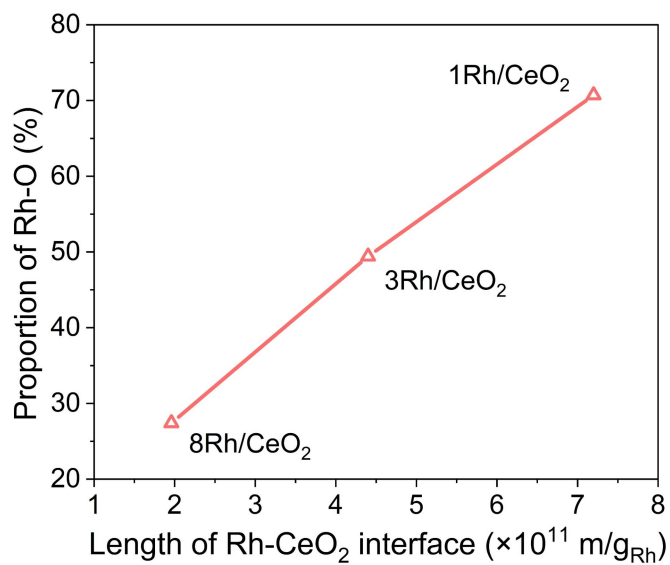

**Fig. S9.** The relationship between the total length of Rh-CeO<sub>2</sub> interface perimeter and the proportion of Rh-O obtained from linear combination fitting (LCF) results.



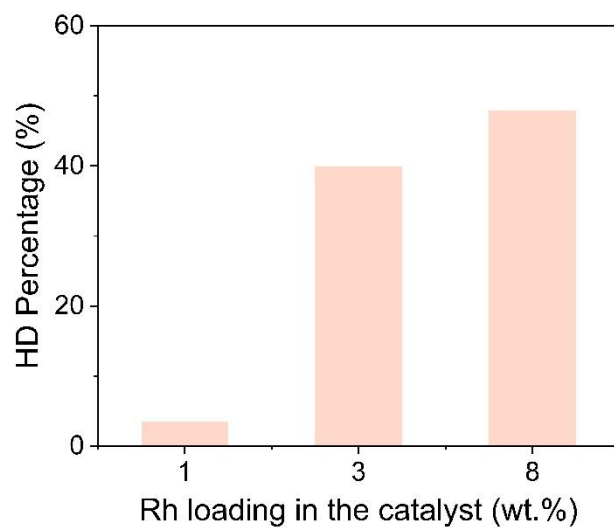

**Fig. S10.** H-D exchange results measured on Rh/CeO<sub>2</sub> catalysts.

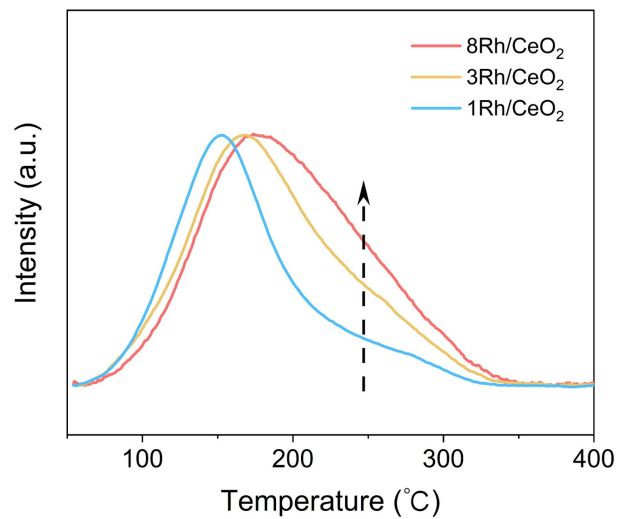

**Fig. S11.** CO-TPD curves of Rh/CeO<sub>2</sub> catalysts.

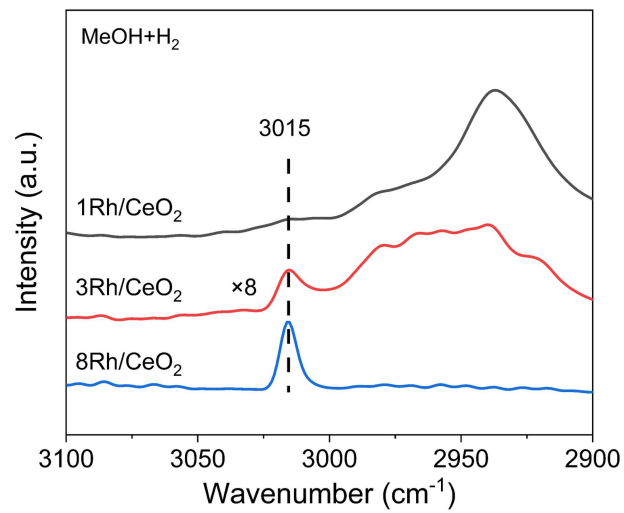

**Fig. S12.** *In situ* DRIFTS of Rh/CeO<sub>2</sub> catalysts at 320 °C after the MeOH+H<sub>2</sub> reaction was stable.

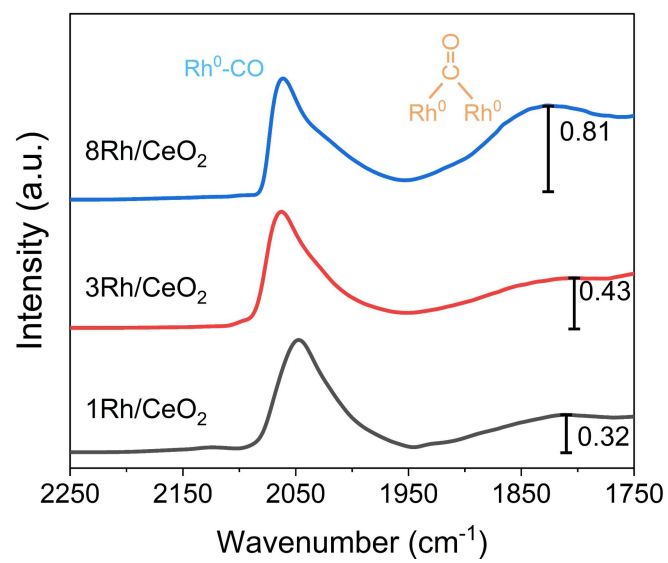

**Fig. S13.** DRIFTS of CO adsorption on Rh/CeO<sub>2</sub> catalysts after 2 hours of reaction.

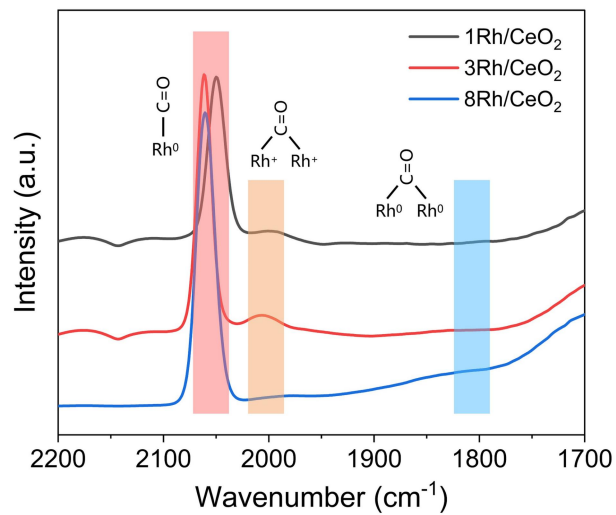

**Fig. S14.** *In situ* DRIFTS of CO adsorbed on reduced Rh/CeO<sub>2</sub> catalysts at 320 °C.

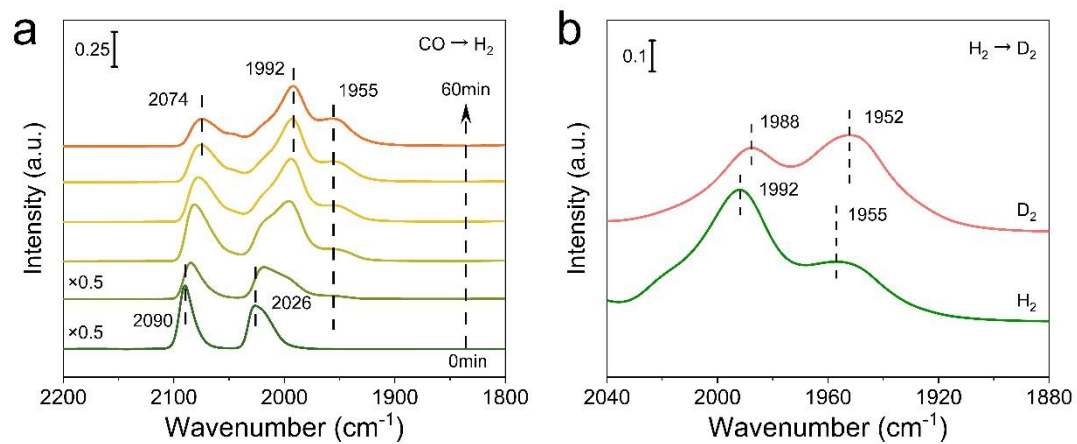

**Fig. S15.** Time-dependent *in situ* DRIFTS of 1Rh/CeO<sub>2</sub> at 125 °C after adsorbing CO to saturation (0 min), and then switching to H<sub>2</sub> (a). After the spectrum stabilizes, switched H<sub>2</sub> to D<sub>2</sub> (b).

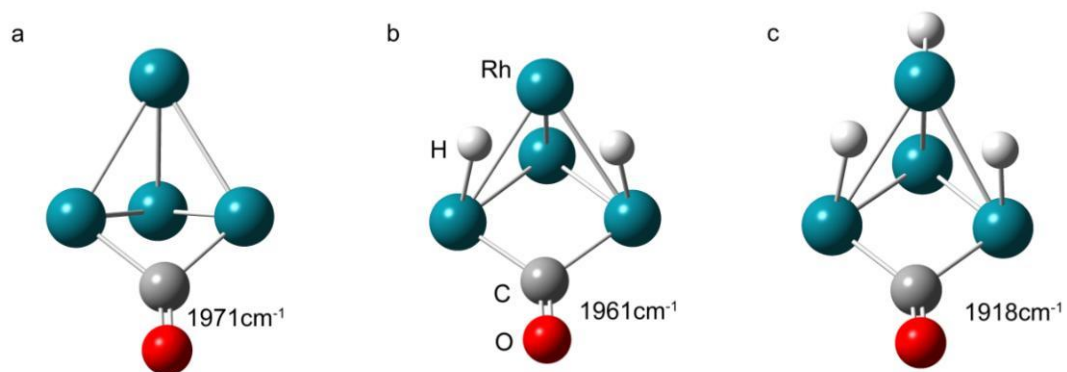

**Fig. S16.** The simulation of CO molecules adsorption on the theoretical structural model of  $\text{Rh}_4$  (a),  $\text{Rh}_2(\text{RhH})_2$  (b) and  $\text{Rh}(\text{RhH})_3$  (c).

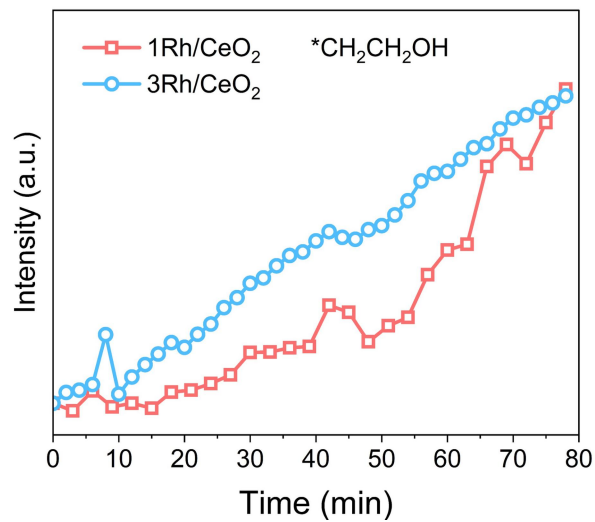

**Fig. S17.** The variation of normalized intensity of \*CH<sub>2</sub>CH<sub>2</sub>OH intermediates over time observed in DRIFTS of 1Rh/CeO<sub>2</sub> and 3Rh/CeO<sub>2</sub>.



**Table S1.** Brunauer-Emmett-Teller (BET) surface area of reduced Rh/CeO<sub>2</sub> catalysts with different Rh loading.

|                                      | 1Rh/CeO <sub>2</sub> | 3Rh/CeO <sub>2</sub> | 8Rh/CeO <sub>2</sub> |
|--------------------------------------|----------------------|----------------------|----------------------|
| BET surface area (m <sup>2</sup> /g) | 76.62                | 78.48                | 76.48                |

**Table S2.** Rh loading in Rh/CeO<sub>2</sub> catalysts based on the results of ICP-AES.

|                    | 1Rh/CeO <sub>2</sub> | 2Rh/CeO <sub>2</sub> | 3Rh/CeO <sub>2</sub> | 5Rh/CeO <sub>2</sub> | 8Rh/CeO <sub>2</sub> |
|--------------------|----------------------|----------------------|----------------------|----------------------|----------------------|
| Rh loading (wt. %) | 0.94                 | 1.88                 | 2.81                 | 4.84                 | 7.56                 |

**Table S3.** Metal dispersion measurement results of Rh/CeO<sub>2</sub> catalysts.

|                     | 1Rh/CeO <sub>2</sub> | 2Rh/CeO <sub>2</sub> | 3Rh/CeO <sub>2</sub> | 5Rh/CeO <sub>2</sub> | 8Rh/CeO <sub>2</sub> |
|---------------------|----------------------|----------------------|----------------------|----------------------|----------------------|
| D <sub>Rh</sub> (%) | 59.99                | 35.50                | 26.78                | 26.08                | 21.55                |

**Table S4.** Quantitative calculation after peak fitting of the Raman spectrum.

|                      |          | D <sub>1</sub> /F <sub>2g</sub> | D <sub>2</sub> /F <sub>2g</sub> | D <sub>3</sub> /F <sub>2g</sub> |
|----------------------|----------|---------------------------------|---------------------------------|---------------------------------|
| 1Rh/CeO <sub>2</sub> | Calcined | 0.04                            | 1.06                            | 0.04                            |
|                      | Reduced  | 0.14                            | 0.78                            | 0                               |
| 3Rh/CeO <sub>2</sub> | Calcined | 0.02                            | 2.29                            | 0.20                            |
|                      | Reduced  | 0.31                            | 1.39                            | 0                               |
| 8Rh/CeO <sub>2</sub> | Calcined | 0.01                            | 4.10                            | 0.24                            |
|                      | Reduced  | 0.82                            | 1.97                            | 0                               |

**Table S5.** Linear combination fitting (LCF) results for Rh/CeO<sub>2</sub> catalysts.

|                      | Rh <sup>0</sup> (%) | Rh-O (%) | R factor |
|----------------------|---------------------|----------|----------|
| 1Rh/CeO <sub>2</sub> | 29.3                | 70.7     | 0.018    |
| 3Rh/CeO <sub>2</sub> | 50.6                | 49.4     | 0.013    |
| 8Rh/CeO <sub>2</sub> | 72.6                | 27.4     | 0.008    |

**Table S6.** The EXAFS fitting results of reduced Rh/CeO<sub>2</sub> catalysts.

| Sample                            | Shell | CN <sup>a</sup> | R/Å <sup>b</sup> | $\sigma^2 \times 10^3 / \text{Å}^2$ <sup>c</sup> | $\Delta E_0 / \text{eV}$ <sup>d</sup> | R factor |
|-----------------------------------|-------|-----------------|------------------|--------------------------------------------------|---------------------------------------|----------|
| Rh foil <sup>e</sup>              | Rh-Rh | 12.00           | 2.69 ± 0.01      | 3.5                                              | 4.7                                   | 0.004    |
| 1Rh/CeO <sub>2</sub> <sup>f</sup> | Rh-O  | 3.24 ± 1.50     | 2.04 ± 0.04      | 12                                               | 0.7                                   |          |
|                                   | Rh-Rh | 0.33 ± 0.93     | 2.71 ± 0.17      | 4.8                                              | -0.6                                  |          |
| 3Rh/CeO <sub>2</sub> <sup>g</sup> | Rh-O  | 5.08 ± 2.19     | 2.05 ± 0.02      | 6.5                                              | 5.4                                   | 0.017    |
|                                   | Rh-Rh | 1.05 ± 0.35     | 2.68 ± 0.04      | 4.8                                              | 3.8                                   |          |
| 8Rh/CeO <sub>2</sub> <sup>h</sup> | Rh-O  | 3.63 ± 1.08     | 2.04 ± 0.02      | 3.0                                              | -0.8                                  |          |
|                                   | Rh-Rh | 5.29 ± 0.20     | 2.67 ± 0.01      | 4.8                                              | -3.8                                  |          |

<sup>a</sup> CN, coordination number.

<sup>b</sup> R, bonding distance.

<sup>c</sup>  $\sigma^2$ , the Debye-Waller factor (a measure of thermal and static disorder in absorber-scatterer distances).

<sup>d</sup>  $\Delta E_0$ , the edge energy shift (the difference between the zero kinetic energy value of the sample and that of the theoretical model).

$S_0^2$ , the amplitude attenuation factor, was fixed to 0.84 as determined from Rh foil fitting.

<sup>e</sup> Fitting range:  $3.0 \leq k (\text{Å}^{-1}) \leq 12.35$  and  $1.5 \leq R (\text{Å}) \leq 3.0$ .

<sup>f</sup> Fitting range:  $3.0 \leq k (\text{Å}^{-1}) \leq 11.20$  and  $1.0 \leq R (\text{Å}) \leq 3.0$ .

<sup>g</sup> Fitting range:  $3.0 \leq k (\text{Å}^{-1}) \leq 11.30$  and  $1.0 \leq R (\text{Å}) \leq 3.0$ .

<sup>h</sup> Fitting range:  $3.0 \leq k (\text{Å}^{-1}) \leq 12.40$  and  $1.0 \leq R (\text{Å}) \leq 3.0$ .

**Table S7.** Catalytic Performance of Rh/CeO<sub>2</sub> catalysts with different Rh loading.

| Catalyst             | X <sub>CO</sub> (%) | Selectivity (C %) |                 |      |                      |                    | Distribution of Oxygenates (C %) |                     |                       |
|----------------------|---------------------|-------------------|-----------------|------|----------------------|--------------------|----------------------------------|---------------------|-----------------------|
|                      |                     | CO <sub>2</sub>   | CH <sub>4</sub> | MeOH | C <sub>2+</sub> -Oxy | C <sub>2+</sub> -H | CH <sub>3</sub> OH               | C <sub>2</sub> -Oxy | C <sub>3-5</sub> -Oxy |
| 1Rh/CeO <sub>2</sub> | 2.6                 | 37.0              | 25.2            | 21.6 | 12.3                 | 3.9                | 63.6                             | 13.3                | 23.1                  |
| 2Rh/CeO <sub>2</sub> | 4.2                 | 26.3              | 24.8            | 20.7 | 22.9                 | 5.3                | 47.4                             | 33.8                | 18.8                  |
| 3Rh/CeO <sub>2</sub> | 5.7                 | 20.7              | 33.0            | 13.1 | 25.1                 | 8.1                | 34.4                             | 55.0                | 10.6                  |
| 5Rh/CeO <sub>2</sub> | 11.5                | 18.0              | 43.1            | 8.3  | 22.4                 | 8.2                | 27.0                             | 66.6                | 6.4                   |
| 8Rh/CeO <sub>2</sub> | 17.7                | 17.1              | 51.6            | 4.4  | 19.3                 | 7.6                | 18.6                             | 76.6                | 4.8                   |

**Table S8.** Catalytic performance of monometallic Rh catalysts on different supports.

| Catalysts                         | X <sub>Co</sub> (%) | Selectivity     |                 |      |                     |                   | ref               |
|-----------------------------------|---------------------|-----------------|-----------------|------|---------------------|-------------------|-------------------|
|                                   |                     | CO <sub>2</sub> | CH <sub>4</sub> | MeOH | C <sub>2</sub> +Oxy | C <sub>2</sub> +H |                   |
| 3Rh/CeO <sub>2</sub>              | 5.7                 | 20.7            | 33.0            | 13.1 | 25.1                | 8.1               | This work         |
| Rh/NCNT                           | 23                  | 46              | 33.2            | 1.0  | 13.1                | 21.8              | <a href="#">3</a> |
| Rh/TiO <sub>2</sub>               | 0.8                 | 2.5             | 58              | 6.8  | 20.4                | 8.6               | <a href="#">4</a> |
| Rh/WC                             | 11.4                | 29.1            | 35.4            | 15.2 | 10.3                | 10.0              | <a href="#">5</a> |
| Rh/Al <sub>2</sub> O <sub>3</sub> | 5.2                 | 9.8             | 34.7            | 6.1  | 7.8                 | 41.6              | <a href="#">6</a> |
| Rh/SiO <sub>2</sub>               | 5                   | ~0              | 70.2            | 1.4  | 15.0                | 11.6              | <a href="#">7</a> |
| Rh/SBA-15                         | 68.8                | 62.8            | 36.5            | 0.4  | 0.11                | —                 | <a href="#">8</a> |



**Table S9.** Catalytic Performance of 3Rh/CeO<sub>2</sub> catalyst in long-term test.

| Time (h) | X <sub>CO</sub> (%) | Selectivity (C%) |                 |      |                      |                   | Distribution of Oxygenates (C%) |                     |                       |
|----------|---------------------|------------------|-----------------|------|----------------------|-------------------|---------------------------------|---------------------|-----------------------|
|          |                     | CO <sub>2</sub>  | CH <sub>4</sub> | MeOH | C <sub>2+</sub> -Oxy | C <sub>2+</sub> H | CH <sub>3</sub> OH              | C <sub>2</sub> -Oxy | C <sub>3-5</sub> -Oxy |
| 15       | 5.9                 | 24.5             | 33.4            | 11.3 | 25.2                 | 5.6               | 30.9                            | 61.0                | 8.1                   |
| 27       | 6.5                 | 23.4             | 31.0            | 12.4 | 26.9                 | 6.4               | 31.4                            | 59.9                | 8.7                   |
| 39       | 7.2                 | 23.2             | 29.7            | 13.2 | 27.0                 | 6.9               | 32.9                            | 57.1                | 10.0                  |
| 51       | 6.8                 | 23.2             | 29.6            | 13.2 | 26.7                 | 7.3               | 33.1                            | 56.0                | 10.9                  |
| 63       | 8.0                 | 22.4             | 29.5            | 13.3 | 26.9                 | 7.9               | 33.0                            | 54.6                | 12.4                  |
| 87       | 8.3                 | 20.7             | 30.9            | 12.8 | 26.5                 | 9.2               | 32.6                            | 53.5                | 13.9                  |
| 99       | 8.8                 | 22.9             | 29.5            | 12.3 | 26.1                 | 9.2               | 32.1                            | 52.7                | 15.2                  |
| 110      | 8.9                 | 22.5             | 30.4            | 12.1 | 26.0                 | 11.0              | 31.8                            | 51.9                | 16.3                  |

## References

- 1 Jiang, F.; Wang, S.; Liu, B.; Liu, J.; Wang, L.; Xiao, Y.; Xu, Y.; Liu, X. *ACS Catal.*, 2020, **10**, 11493-11509.
- 2 Hu, Z.; Liu, X.; Meng, D.; Guo, Y.; Guo, Y.; Lu, G. *ACS Catal.*, 2016, **6**, 2265-2279.
- 3 Z. L. Xie, B. Frank; X. Huan,; R. Schlogl, Trunschke, *Catal. Lett.* 2016, **146**, 2417-2424.
- 4 A. Egbebi, V. Schwartz, S. H. Overbury, J. J. Spivey, *Catal. Today*, 2010, **149**, 91-97.
- 5 B. D. Won, H. Ham, J. M. Cho, J. B. Lee, C. U. Kim, H. S. Roh, D. J. Moon, J. W. Bae, *RSC Adv.*, 2016, **6**, 101535-101543.
- 6 Y. Chen, H. T. Zhang, H. F. Ma, W. X. Qian, F. Y. Jin, W. Y. Ying, *Catal. Lett.*, 2018, **148**, 691-698.
- 7 W. Mao, J. J. Su, Z. P. Zhang, X. C. Xu, W. W. Dai, D. L. Fu, J. Xu, X. G. Zhou, *Chem. Eng. Sci.*, 2015, **135**, 312-322.
- 8 G. C. Chen, C. Y. Guo, Z. J. Huang, G. Q. Yuan, *Chem. Eng. Res. Des.*, 2011, **89**, 249-253.
